# Supplementary material for: DNA requirement in FANCD2 deubiquitination by USP1-UAF1-RAD51AP1 in the Fanconi anemia DNA damage response
Source: PubMed Central journal article supplement (PMC6599204; doi:10.1038/s41467-019-10408-5), 2019-06-28
Supplement: 41467_2019_10408_MOESM1_ESM.pdf [file 41467_2019_10408_MOESM1_ESM.pdf]

## **Supplementary Information**

### **DNA Requirement in FANCD2 Deubiquitination by USP1-UAF1-RAD51AP1 in the Fanconi anemia DNA Damage Response**

Liang, *et al*

**Supplementary Table 1. Primers used in this study**

| <b>Primer Name</b>         | <b>Sequence (listed 5'-3')</b>                                     |
|----------------------------|--------------------------------------------------------------------|
| UAF1 <sup>R30A</sup> -FWD  | CAG AGC ATT GAC TCC ATT TGC GTT GTA CTT CTC CAC<br>TTC A           |
| UAF1 <sup>R30A</sup> -REV  | TGA AGT GGA GAA GTA CAA CGC AAA TGG AGT CAA<br>TGC TCT G           |
| UAF1 <sup>R50A</sup> -FWD  | CTA AAT AGA CTT TTC ACA GCC GGT GCA GAC TCT ATC<br>ATA AGA ATA TGG |
| UAF1 <sup>R50A</sup> -REV  | CCA TAT TCT TAT GAT AGA GTC TGC ACC GGC TGT GAA<br>AAG TCT ATT TAG |
| UAF1 <sup>K168A</sup> -FWD | TGG CCA GGC TAT AAA TGG AAT CTG CGT TTC CAC TTA<br>AAG AAG AAG TTG |
| UAF1 <sup>K168A</sup> -REV | CAA CTT CTT CTT TAA GTG GAA ACG CAG ATT CCA TTT<br>ATA GCC TGG CCA |

**Supplementary Table 2. Oligonucleotides used in this study**

| <b>Name</b> | <b>Sequence (listed 5'-3')</b>                                                                      | <b>Assay</b>   |
|-------------|-----------------------------------------------------------------------------------------------------|----------------|
| P1          | TTATATCCTTTACTTTGAATTCTATGTTTAACCTTTTACTTAT<br>TTTGTATTAGCCGGATCCTTATTTCAATTATGTTTCAT               | DNA binding    |
| P2          | ATGAACATAATTGAAATAAGGATCCGGCTAATACAAAATAA<br>GTAAGGTTAAACATAGAAATTCAAAGTAAAGGATATAA                 | DNA binding    |
| D1          | CATTGCATATTTAAAACATGTTGGAAGGCTCGATGCATGC<br>TGATAGCCTACTAGTGCTGCTGGCTTTCAAATGACCTCTT<br>ATCAAGTGAC  | DNA binding    |
| D2          | GTCACCTTGATAAGAGGTCATTTGAATTCATGGCTTAGAGCT<br>TAATTGCTGAATCTGGTGCTGGGATCCAACATGTTTTAAAT<br>ATGCAATG | DNA binding    |
| D3          | CTGCTACGATGCTAGTCGTAGCTCGGCAGTCGTAGCAGGT<br>TCCCAGCACCAGATTCAGCAATTAAGCTCTAAGCCATGAA                | DNA binding    |
| 64-mer      | TTTCCCAGCACCAGATTCAGCATAACGTTACCGATCGTACG<br>TTCGATGCTGGCTACTGCTAGCTT                               | Ubiquitination |

**Supplementary Table 3. Summary of UAF1 and RAD51AP1 mutants**

| <b>Mutants</b>                                                                                                           | <b>Activity</b>        | <b>Reference</b>    |
|--------------------------------------------------------------------------------------------------------------------------|------------------------|---------------------|
| UAF1 <sup>11A</sup><br>(Residues R30, R50, K117, T161,<br>K168, S230, R272, R274, K275,<br>K318 and I363 converted to A) | DNA Binding Deficient  | This Study          |
| UAF1 <sup>3A</sup><br>(Residues R30, R50 and K168<br>converted to A)                                                     | DNA Binding Deficient  | This Study          |
| UAF1 <sup>436X</sup>                                                                                                     | DNA Binding Proficient | Liang et al., 2016  |
| UAF1 <sup>SLD</sup>                                                                                                      | DNA Binding Deficient  | Liang et al., 2016  |
| RAD51AP1 <sup>DM</sup><br>(N-K6RA/C-K7WA)                                                                                | DNA Binding Deficient  | Dunlop et al., 2012 |

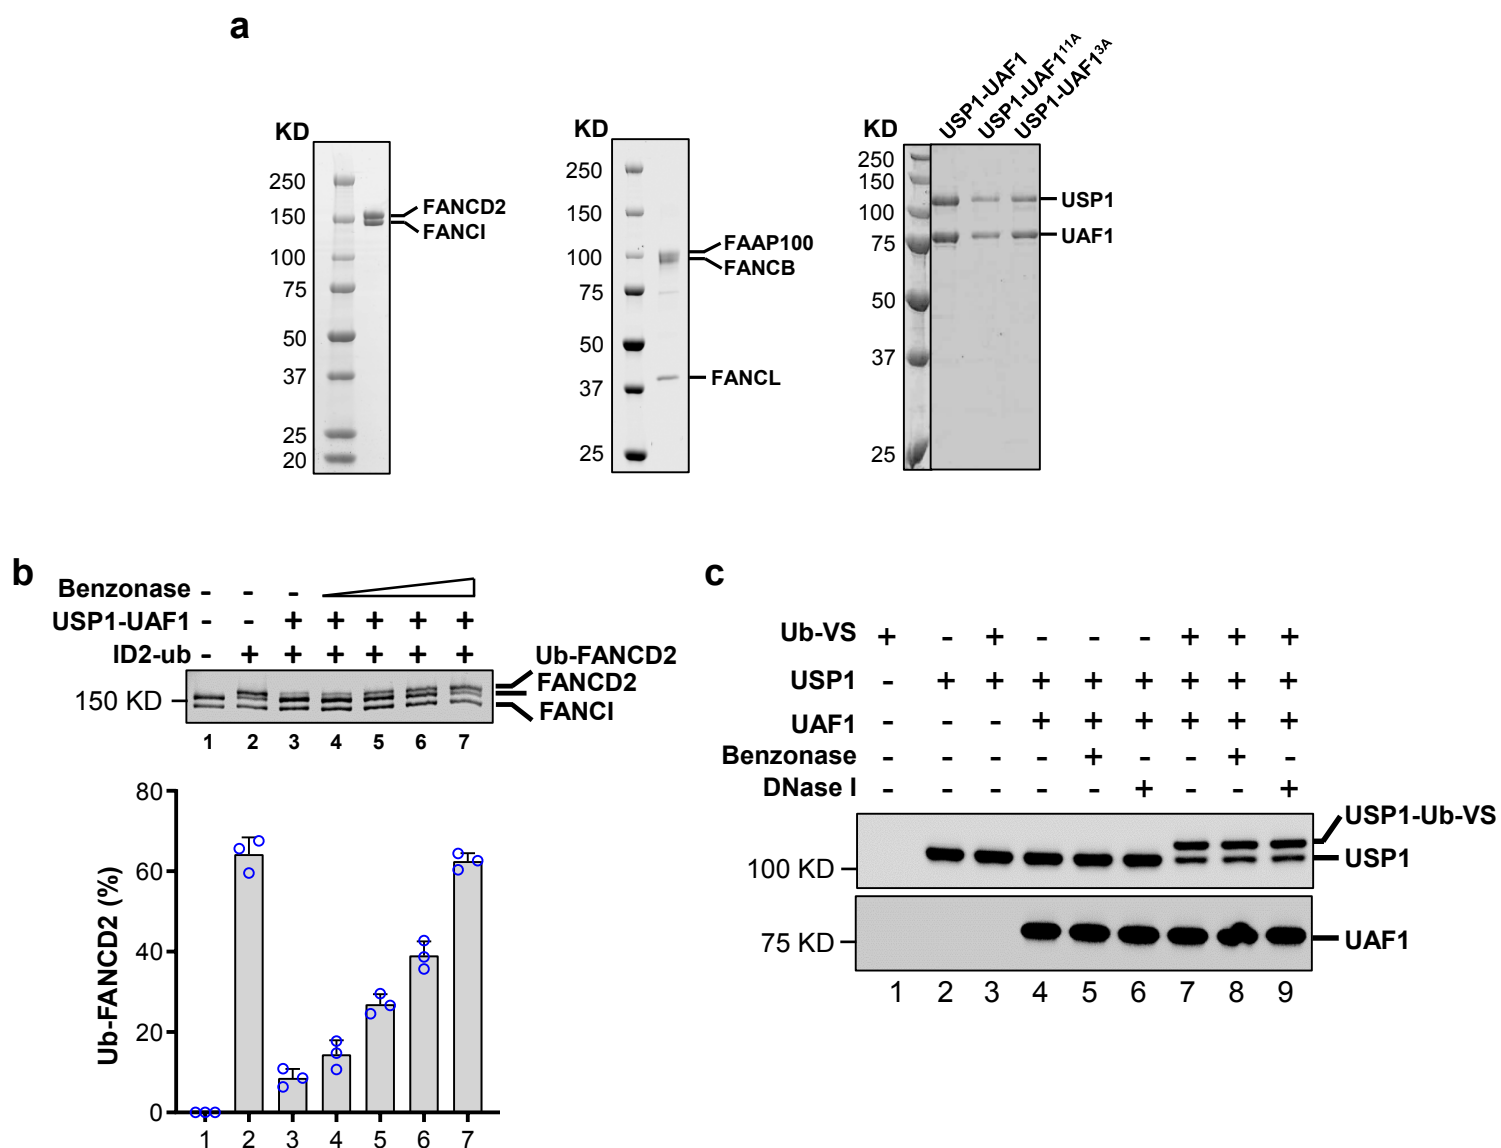

**Supplementary Figure 1 Purified proteins used for FANCD2 ubiquitination and deubiquitination.**

**a**, Purified ID2, BL100 and wild type or mutant forms USP1-UAF1 were analyzed by SDS-PAGE with Coomassie Blue staining.

**b**, Effect of benzonase (0.01, 0.04, 0.08, 0.2 U; lanes 4-7) on FANCD2 deubiquitination. The error bars represent mean values + S.D. of data from three independent experiments.

**c**, The DUB activity of purified USP1-UAF1 was monitored using the Ub-VS probe without or with benzonase or DNase I. UAF1 and USP1 were visualized by Western blotting.

**a**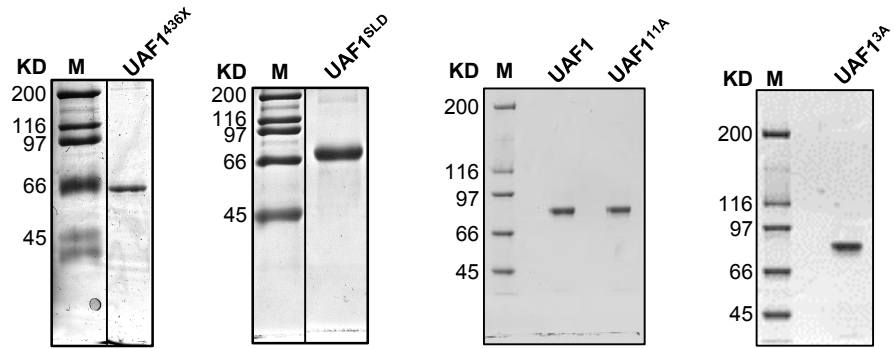**b**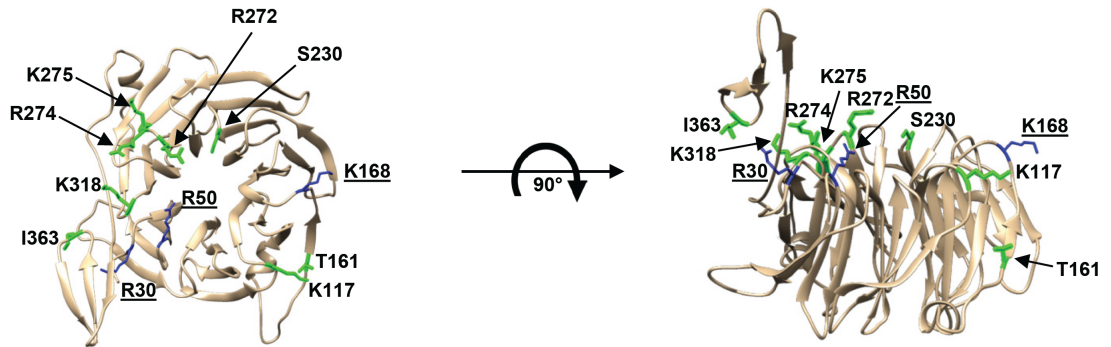**c**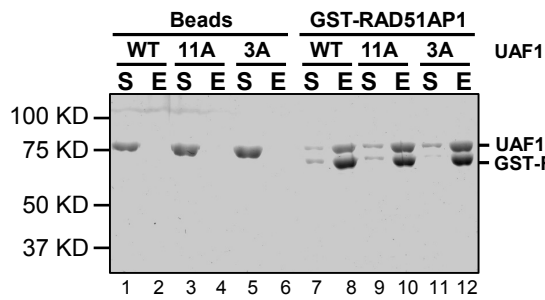**d**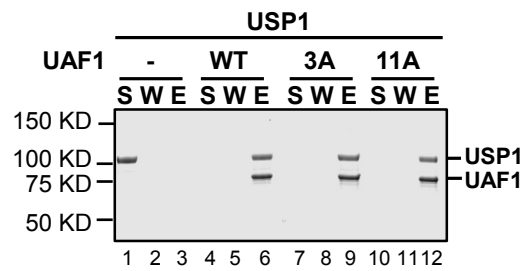**e**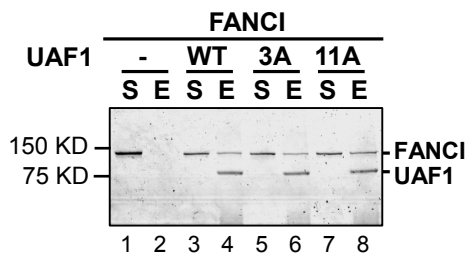**f**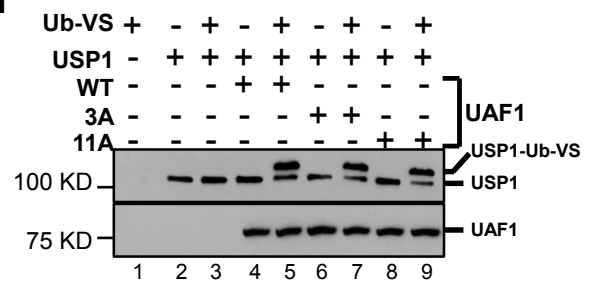

**Supplementary Figure 2 Construction and characterization of UAF1 mutants**

**a**, Purified UAF1, UAF1<sup>436X</sup>, UAF1<sup>SLD</sup>, UAF1<sup>11A</sup> and UAF1<sup>3A</sup> were analyzed by SDS-PAGE with Coomassie Blue staining.

**b**, Cartoon representation of the crystal structure of the UAF1 WD40 repeat domain highlighting the amino acid residues changed in the 3A (underlined) and 11A (underlined and not underlined residues) mutants.

**c**, GST-tagged RAD51AP1 was tested for interaction with wild type and mutant UAF1 proteins. Glutathione resin was used in the pulldown. S, supernatant containing unbound proteins; E, SDS eluate of the affinity resin.

**d**, Strep II-tagged wild type and mutant UAF1 proteins were tested for USP1 interaction. Strep-Tactin resin was used in the pulldown. S, supernatant containing unbound proteins; W, buffer wash of the affinity matrix; E, SDS eluate of the affinity resin.

**e**, Strep II-tagged UAF1 and mutants were tested for FANCI interaction. Strep-Tactin resin was used in the pulldown. S, supernatant containing unbound proteins; E, SDS eluate of the affinity resin.

**f**, Stimulation of USP1 DUB activity by UAF1 DNA binding mutants. The DUB activity of purified USP1 and UAF1 (WT), UAF1<sup>3A</sup> (3A) and UAF1<sup>11A</sup> (11A) was monitored using the Ub-VS probe as in Supplemental Figure 1c.

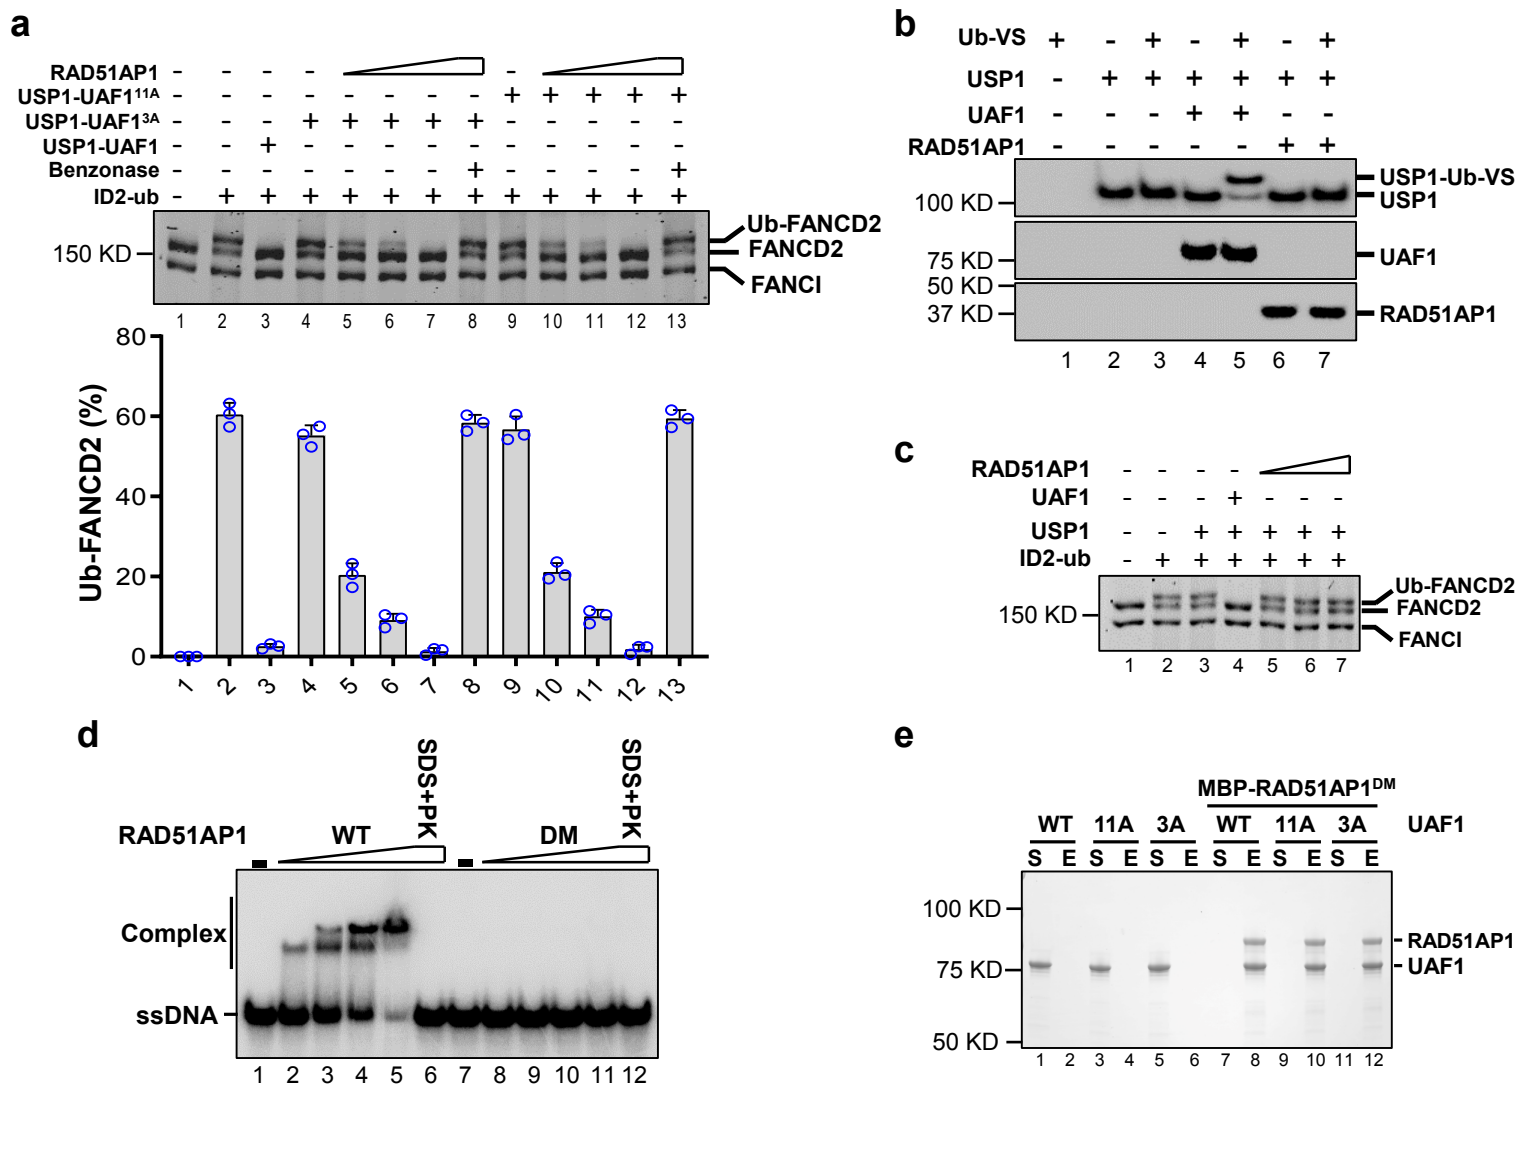

**Supplementary Figure 3 DNA targeting of USP1-UAF1 by RAD51AP1 in FANCD2 deubiquitination.**

- a**, RAD51AP1 was tested in FANCD2 deubiquitination reactions with USP1-UAF1, USP1-UAF1<sup>3A</sup> and USP1-UAF1<sup>11A</sup>. The error bars represent the mean + S.D. of data from three independent experiments.
- b**, In the absence of UAF1, RAD51AP1 does not stimulate USP1 activity. The DUB activity of purified USP1 and RAD51AP1 or UAF1 was monitored using the Ub-VS probe as in Supplemental Figure 1c. UAF1, USP1, and RAD51AP1 were visualized by Western blotting.
- c**, RAD51AP1 was tested in FANCD2 deubiquitination reactions with USP1.
- d**, RAD51AP1 and RAD51AP1<sup>DM</sup> (10, 25, 50 and 100 nM) were examined for ssDNA binding. SDS+PK: SDS and proteinase K treatment to digest protein.
- e**, MBP-tagged RAD51AP1<sup>DM</sup> was tested for interaction with UAF1, UAF1<sup>3A</sup> and UAF1<sup>11A</sup>. Protein complexes were captured on amylose resin. S, supernatant containing unbound proteins; E, SDS eluate of the affinity resin.

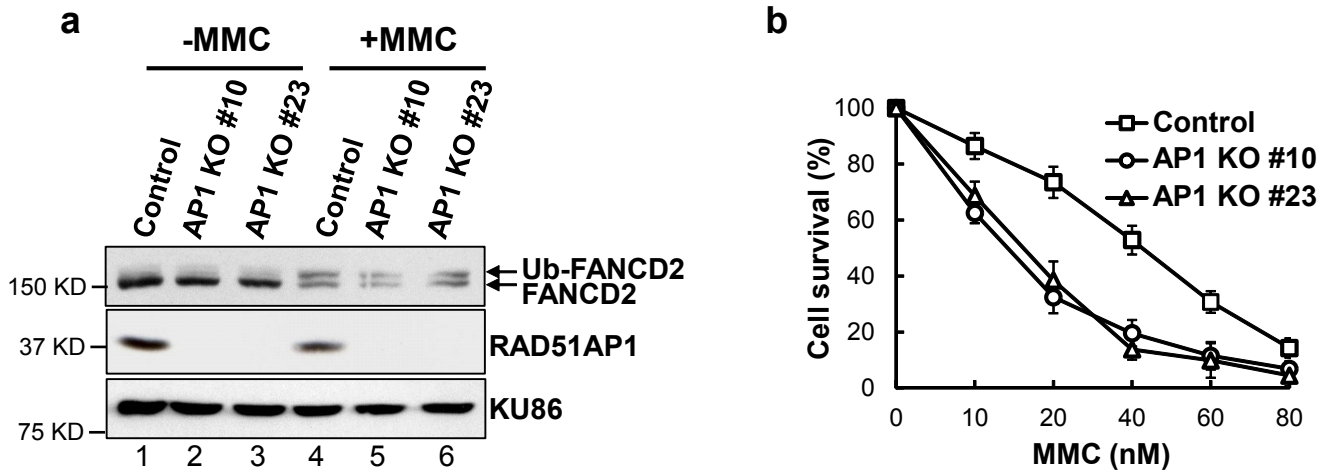

**Supplementary Figure 4 Examination of RAD51AP1 null cells for FANCD2 ubiquitination and MMC sensitivity.**

**a**, FANCD2 ubiquitination was examined in RAD51AP1 knockout cell lines (#10 and #23) with or without MMC treatment (1  $\mu$ M for 16 h).

**b**, Survival of RAD51AP1 knockout cells (clone #10 or #23) after MMC treatment. The error bars represent the mean  $\pm$  S.D. of data from three independent experiments.
